# Supplementary material for: Layered Double Hydroxide (MgFeAl-LDH)-Based Polypropylene (PP) Nanocomposite: Mechanical Properties and Thermal Degradation
Source: MDPI journal article supplement (doi:10.3390/polym13193452), 2021-10-08
Supplement: s1 [file s1]

# Layered Double Hydroxide (MgFeAl-LDH)-Based Polypropylene (PP) Nanocomposite: Mechanical Properties and Thermal Degradation

Sajid Naseem <sup>1,2 \*</sup>, Sven Wießner <sup>1,2</sup>, Ines Kühnert <sup>1</sup>, Andreas Leuteritz <sup>1</sup>

<sup>1</sup> Leibniz-Institut für Polymerforschung Dresden e.V., Hohe Straße 6, 01069 Dresden, Germany; naseem@ipfdd.de (S.N.); wiessner@ipfdd.de (S.W.); kuehnert@ipfdd.de (I.K.); leuteritz@ipfdd.de (A.L.)

<sup>2</sup> Institute of Materials Science, Technische Universität Dresden, 01062 Dresden, Germany

\* Correspondence: naseem@ipfdd.de; Tel.: +49 351 4658 689

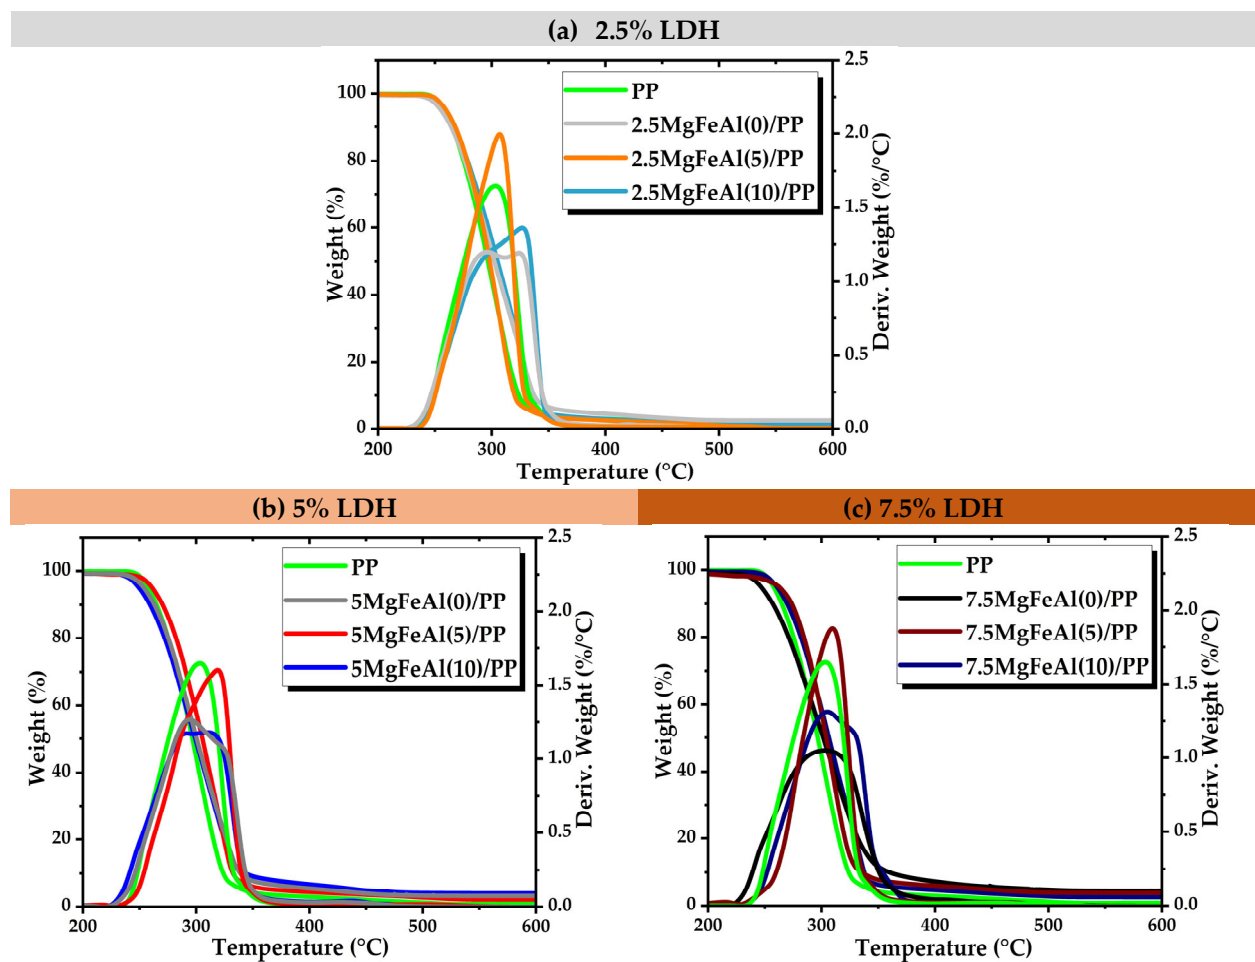

**Figure S1.** TGA analysis of different LDH/PP nanocomposites in nitrogen environment showing the effect of amount of Fe (a) 2.5 % LDH (b) 5% LDH (c) 7.5% LDH

(a) 2.5% LDH

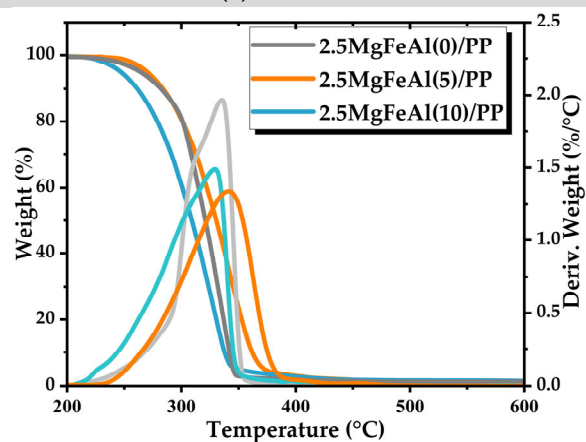

(b) 5% LDH

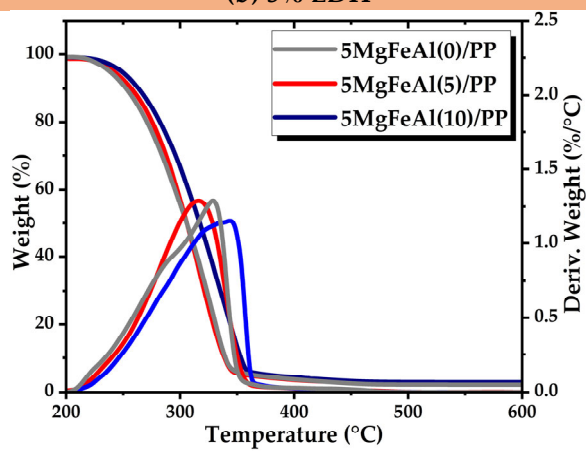

(c) 7.5% LDH

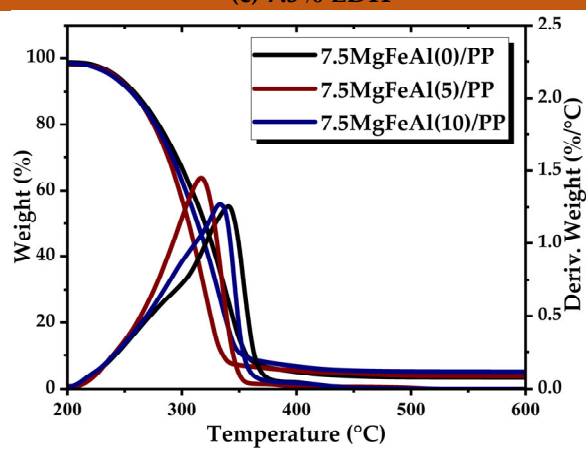

**Figure S2.** TGA analysis of different LDH/PP nanocomposites in air environment showing the effect of amount of Fe (a) 2.5 % LDH (b) 5% LDH (c) 7.5% LDH.
